# Supplementary material
Source: HighWire-hosted journal article supplement (https://mentalhealth.bmj.com/highwire/filestream/68330/field_highwire_adjunct_files/0/84114table.pdf)
Supplement: 84114table.pdf [file 84114table.pdf]

Adjusted odds ratios for suicide by phase of admission or discharge and by number of hospitalisations

|                         | <b>OR for women (95% CI)*</b> | <b>OR for men (95% CI)*</b> |
|-------------------------|-------------------------------|-----------------------------|
| <b>Admission period</b> |                               |                             |
| First week              | 81.6 (52.1 to 127.7)          | 59.8 (42.1 to 85.1)         |
| Weeks 2 to 4            | 71.0 (49.9 to 101.0)          | 51.9 (38.2 to 70.7)         |
| 1–6 months              | 49.8 (37.9 to 65.6)           | 30.4 (24.1 to 38.3)         |
| 7–12 months             | 37.2 (19.8 to 69.9)           | 9.9 (6.2 to 15.7)           |
| 1 year and over         | 1.5 (0.8 to 3.0)              | 1.6 (1.1 to 2.6)            |
| <b>Discharge period</b> |                               |                             |
| First week              | 246.0 (152.5 to 396.6)        | 102.0 (73.2 to 142.1)       |
| Weeks 2–4               | 90.7 (66.0 to 124.6)          | 62.1 (48.4 to 79.6)         |
| 1–6 months              | 35.8 (29.1 to 44.0)           | 28.4 (24.0 to 33.5)         |
| 7–12 months             | 19.3 (15.6 to 23.9)           | 14.7 (12.3 to 17.7)         |
| 1–3 years               | 10.5 (8.7 to 12.6)            | 6.4 (5.5 to 7.4)            |
| 4–5 years               | 5.4 (4.4 to 6.6)              | 4.6 (3.9 to 5.5)            |
| Over 5 years            | 3.0 (2.6 to 3.6)              | 2.8 (2.5 to 3.3)            |

\*Comparisons versus people with no admission history.
